# Supplementary material for: Structural characterization and luminescence properties of trigonal Cu(i) iodine/bromine complexes comprising cation–π interactions
Source: Royal Society of Chemistry journal article supplement (doi:10.1039/d2nj00318j), 2022-01-01
Supplement: d2nj00318j1.pdf [file d2nj00318j1.pdf]

Electronic Supplementary Material (ESI) for New Journal of Chemistry.

## Structural characterization and luminescence properties of trigonal Cu(I) iodine/bromine complexes comprising cation– $\pi$ interactions<sup>†</sup>

Xiaolin Yin<sup>a</sup>, Chunmei, Liu<sup>a</sup>, Shuang Liu<sup>a</sup>, Mengmeng Cao<sup>a</sup>, Jeremy M. Rawson<sup>b</sup>, Yan Xu<sup>a,\*</sup>, Bin Zhang<sup>a,\*</sup>

<sup>a</sup>College of Chemistry, Zhengzhou University, Zhengzhou, 450001, P. R. China.

<sup>b</sup>Department of Chemistry and Biochemistry, University of Windsor, Windsor, Ontario, N9B 3P4, Canada.

\* corresponding email address: E-mail: [xuyan@zzu.edu.cn](mailto:xuyan@zzu.edu.cn), [bz@zzu.edu.cn](mailto:bz@zzu.edu.cn).

**Table S1** Crystal parameters of complexes **1**, **2** and **3**.

| Compound reference                        | <b>1</b>                                                         | <b>2</b>                                                          | <b>3</b>                                                          |
|-------------------------------------------|------------------------------------------------------------------|-------------------------------------------------------------------|-------------------------------------------------------------------|
| Formula                                   | C <sub>43</sub> H <sub>32</sub> CuIN <sub>2</sub> P <sub>2</sub> | C <sub>43</sub> H <sub>32</sub> CuBrN <sub>2</sub> P <sub>2</sub> | C <sub>43</sub> H <sub>32</sub> CuClN <sub>2</sub> P <sub>2</sub> |
| Temperature/K                             | 291.15                                                           | 291(2)                                                            | 293(2)                                                            |
| Crystal system                            | orthorhombic                                                     | orthorhombic                                                      | monoclinic                                                        |
| Space group                               | P2 <sub>1</sub> 2 <sub>1</sub> 2 <sub>1</sub>                    | P2 <sub>1</sub> 2 <sub>1</sub> 2 <sub>1</sub>                     | P2 <sub>1</sub> /c                                                |
| a/Å                                       | 10.656(2)                                                        | 10.6373(18)                                                       | 18.975(4)                                                         |
| b/Å                                       | 17.374(3)                                                        | 17.157(3)                                                         | 11.948(2)                                                         |
| c/Å                                       | 20.131(4)                                                        | 19.959(3)                                                         | 17.490(3)                                                         |
| $\alpha$ /°                               | 90                                                               | 90                                                                | 90                                                                |
| $\beta$ /°                                | 90                                                               | 90                                                                | 113.44(3)                                                         |
| $\gamma$ /°                               | 90                                                               | 90                                                                | 90                                                                |
| Volume/Å <sup>3</sup>                     | 3727.2(12)                                                       | 3642.7(11)                                                        | 3638.0(12)                                                        |
| Z                                         | 4                                                                | 4                                                                 | 4                                                                 |
| $\rho_{\text{calc.}}$ / g·cm <sup>3</sup> | 1.478                                                            | 1.426                                                             | 1.403                                                             |
| $\mu$ / mm <sup>-1</sup>                  | 1.533                                                            | 1.818                                                             | 0.799                                                             |
| F (000)                                   | 1665.4                                                           | 1582.0                                                            | 1586.0                                                            |
| Radiation                                 | Mo K $\alpha$ ( $\lambda$ = 0.71073)                             | MoK $\alpha$ ( $\lambda$ = 0.71073)                               | MoK $\alpha$ ( $\lambda$ = 0.71073)                               |
| 2 $\theta$ range for data collection/°    | 4.32 to 55.06                                                    | 6.08 to 54.964°                                                   | 4.25 to 52.744                                                    |
| Reflections collected                     | 64211                                                            | 51998                                                             | 55089                                                             |
| Independent reflections                   | 8546 [R(int) = 0.0368,<br>R <sub>sigma</sub> = 0.0257]           | 8321[R(int) = 0.0477,<br>R <sub>sigma</sub> = 0.0442]             | 7417 [R(int) = 0.0724,<br>R <sub>sigma</sub> = 0.0471]            |
| Data/restraints/parameters                | 8546/0/443                                                       | 8321/0/442                                                        | 7417/937/884                                                      |
| Goodness-of-fit on F <sup>2</sup>         | 1.055                                                            | 1.022                                                             | 1.017                                                             |
| Final R indexes [ $I \geq 2\sigma(I)$ ]   | R <sub>1</sub> = 0.0234<br>wR <sub>2</sub> = 0.0467              | R <sub>1</sub> = 0.0305<br>wR <sub>2</sub> = 0.0600               | R <sub>1</sub> = 0.0436<br>wR <sub>2</sub> = 0.1070               |
| CCDC                                      | 2129756                                                          | 2129758                                                           | 2129759                                                           |

**Table S2** Selected bond lengths [ $\text{\AA}$ ] and angles ( $^\circ$ ) for the Cu(I) complexes **1**, **2** and **3**.

| Complex  | Length/ $\text{\AA}$ |            | Angle/ $^\circ$ |             |
|----------|----------------------|------------|-----------------|-------------|
| <b>1</b> | Cu1-P1               | 2.2808(7)  | I1-Cu1-P1       | 119.612(17) |
|          | Cu1-P2               | 2.2514(7)  | I1-Cu1-P2       | 116.265(18) |
|          | Cu1-I1               | 2.5258(4)  | P1-Cu1-P2       | 121.31(2)   |
| <b>2</b> | Cu1-P1               | 2.2706(10) | Br1-Cu1-P1      | 119.24(3)   |
|          | Cu1-P2               | 2.2432(9)  | Br1-Cu1-P2      | 117.28(3)   |
|          | Cu1-Br1              | 2.3410(6)  | P1-Cu1-P2       | 120.76(4)   |
| <b>3</b> | Cu1-P1               | 2.241(4)   | Cl1-Cu1-P1      | 119.5(2)    |
|          | Cu1-P2               | 2.251(5)   | Cl1-Cu1-P2      | 113.7(2)    |
|          | Cu1-Cl1              | 2.200(6)   | P1-Cu1-P2       | 125.3(2)    |

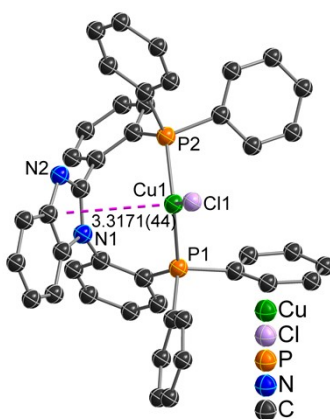**Fig. S1** Molecular structure of the Cu(I) complex **3**. Hydrogen atoms are omitted for clarity.  
Thermal ellipsoid plots at 30% probability.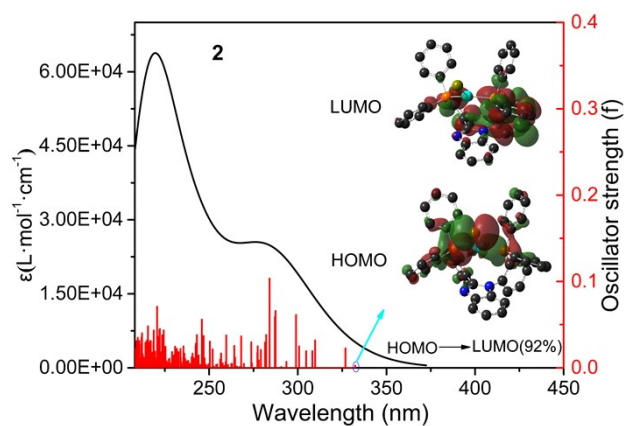**Fig. S2** Simulated absorption spectrum of **2** with frontier molecular orbitals involved in the lowest energy transition.

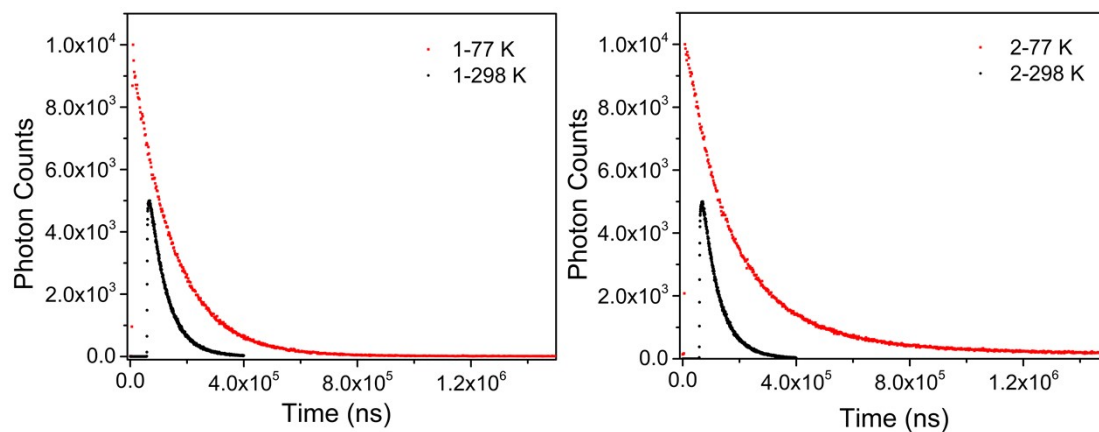

**Fig. S3** Emission decay transient of copper(I) complexes **1** and **2** at different temperature (black dot for 298 K, red dot for 77 K).

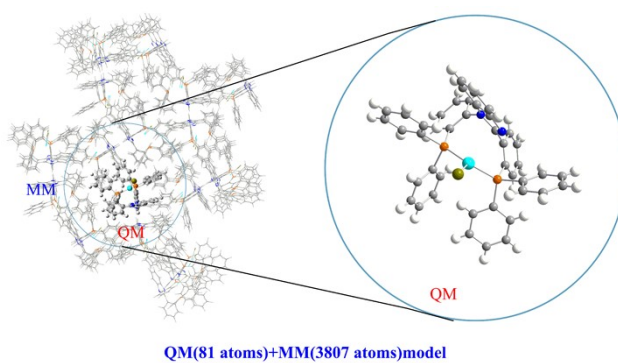

**Fig. S4** ONCIOM model for complex **2**: the central molecule is defined as the active QM part and the surrounding molecules are treated as MM part.
